# Supplementary material
Source: HighWire-hosted journal article supplement (https://qualitysafety.bmj.com/content/30/5/372)
Supplement: inline-supplementary-material-1 [file inline-supplementary-material-1.pdf]

**Appendix Table 1. Adjusted Analyses of Risk for Patient Safety Events by Race/Ethnicity, Insurance, and Limited English Proficiency**

|                        | Race/ ethnicity, Insurance, LEP entered individually* |             |             | Race/ ethnicity, Insurance, LEP entered together* |             |             |
|------------------------|-------------------------------------------------------|-------------|-------------|---------------------------------------------------|-------------|-------------|
|                        | IRR                                                   | 95% CI      | 95% CI      | IRR                                               | 95% CI      | 95% CI      |
| <b>Race/ ethnicity</b> |                                                       |             |             |                                                   |             |             |
| White                  | ref                                                   | ref         | ref         | ref                                               | ref         | ref         |
| Black                  | 1.02                                                  | 0.96        | 1.05        | 1.01                                              | 0.97        | 1.05        |
| Latino                 | 0.94                                                  | 0.88        | 1.01        | 0.98                                              | 0.91        | 1.06        |
| Asian                  | <b>0.89</b>                                           | <b>0.83</b> | <b>0.96</b> | 0.93                                              | 0.86        | 1.01        |
| Other                  | 1.02                                                  | 0.98        | 1.06        | 1.03                                              | 0.99        | 1.07        |
| <b>Insurance</b>       |                                                       |             |             |                                                   |             |             |
| Insured                | ref                                                   | ref         | ref         | ref                                               | ref         | ref         |
| Medicaid               | 0.98                                                  | 0.94        | 1.02        | 1.00                                              | 0.96        | 1.04        |
| <b>Language</b>        |                                                       |             |             |                                                   |             |             |
| LEP                    | <b>0.91</b>                                           | <b>0.87</b> | <b>0.96</b> | <b>0.93</b>                                       | <b>0.88</b> | <b>0.98</b> |

Note: bolded numbers represent values that are statistically significant at  $p < .05$   
Abbreviations: LEP= limited English proficient; IRR= incident rate ratio, CI= confidence interval.  
\*Adjusting for age, sex, marital status, primary diagnosis, clinical risk score, service at discharge, intensive care stay, length of stay, and year of admission. Generalized estimation equations included to account for clustering for multiple admissions per patient.

**Appendix Table 2. Adjusted Analyses of Risk for Patient Safety Events Stratified by Voluntary v. Automated Events**

| <b>Voluntary Reported Patient Safety Events</b> |                                                 |               |               |                                             |               |               |
|-------------------------------------------------|-------------------------------------------------|---------------|---------------|---------------------------------------------|---------------|---------------|
|                                                 | <b>Primary covariates entered individually*</b> |               |               | <b>Primary covariates entered together*</b> |               |               |
|                                                 | <b>IRR</b>                                      | <b>95% CI</b> | <b>95% CI</b> | <b>IRR</b>                                  | <b>95% CI</b> | <b>95% CI</b> |
| <b>Race/ethnicity</b>                           |                                                 |               |               |                                             |               |               |
| White                                           | ref                                             | ref           | ref           | ref                                         | ref           | ref           |
| Black                                           | 0.96                                            | 0.91          | 1.01          | 0.97                                        | 0.92          | 1.02          |
| Latino                                          | <b>0.90</b>                                     | <b>0.83</b>   | <b>0.98</b>   | 0.94                                        | 0.86          | 1.03          |
| Asian                                           | <b>0.87</b>                                     | <b>0.80</b>   | <b>0.96</b>   | 0.92                                        | 0.83          | 1.01          |
| Other                                           | 1.01                                            | 0.96          | 1.06          | 1.02                                        | 0.97          | 1.07          |
| <b>Insurance</b>                                |                                                 |               |               |                                             |               |               |
| Other Insurance                                 | ref                                             | ref           | ref           | ref                                         | ref           | ref           |
| Medicaid                                        | 0.97                                            | 0.92          | 1.02          | 0.99                                        | 0.94          | 1.04          |
| <b>Language</b>                                 |                                                 |               |               |                                             |               |               |
| LEP                                             | <b>0.89</b>                                     | <b>0.85</b>   | <b>0.94</b>   | <b>0.92</b>                                 | <b>0.86</b>   | <b>0.98</b>   |
| <b>Automated Patient Safety Events</b>          |                                                 |               |               |                                             |               |               |
|                                                 | <b>Primary covariates entered individually*</b> |               |               | <b>Primary covariates entered together*</b> |               |               |
|                                                 | <b>IRR</b>                                      | <b>95% CI</b> | <b>95% CI</b> | <b>IRR</b>                                  | <b>95% CI</b> | <b>95% CI</b> |
| <b>Race/ethnicity</b>                           |                                                 |               |               |                                             |               |               |
| White                                           | ref                                             | ref           | ref           | ref                                         | ref           | ref           |
| Black                                           | <b>1.11</b>                                     | <b>1.03</b>   | <b>1.20</b>   | <b>1.12</b>                                 | <b>1.04</b>   | <b>1.21</b>   |
| Latino                                          | 1.06                                            | 0.93          | 1.20          | 1.10                                        | 0.96          | 1.25          |
| Asian                                           | 0.95                                            | 0.83          | 1.09          | 0.98                                        | 0.85          | 1.14          |
| Other                                           | 1.05                                            | 0.97          | 1.13          | 1.06                                        | 0.98          | 1.14          |
| <b>Insurance</b>                                |                                                 |               |               |                                             |               |               |
| Other Insurance                                 | ref                                             | ref           | ref           | ref                                         | ref           | ref           |
| Medicaid                                        | 1.01                                            | 0.94          | 1.09          | 1.01                                        | 0.94          | 1.10          |
| <b>Language</b>                                 |                                                 |               |               |                                             |               |               |
| LEP                                             | 0.97                                            | 0.89          | 1.05          | 0.94                                        | 0.86          | 1.03          |

Note: bolded numbers represent values that are statistically significant at  $p < .05$   
Abbreviations: LEP= limited English proficient; IRR= incident rate ratio; CI= confidence interval.

\*Adjusting for age, sex, marital status, primary diagnosis, clinical risk score, service at discharge, intensive care stay, length of stay, and year of admission. Generalized estimation equations included to account for clustering for multiple admissions per patient.

| <b>Appendix Table 3: Adjusted analyses of Patient Safety Events by Language</b> |             |             |             |
|---------------------------------------------------------------------------------|-------------|-------------|-------------|
| <b>Any Patient Safety Events*</b>                                               |             |             |             |
|                                                                                 | IRR         | 95% CI      |             |
| English                                                                         | ref         | ref         | ref         |
| Spanish                                                                         | 0.95        | 0.88        | 1.03        |
| Chinese                                                                         | <b>0.84</b> | <b>0.75</b> | <b>0.94</b> |
| Russian                                                                         | 1.00        | 0.90        | 1.12        |
| Cape Verdean                                                                    | 0.90        | 0.78        | 1.04        |
| Other                                                                           | 0.88        | 0.82        | 0.95        |
| <b>Voluntary Patient Safety Events*</b>                                         |             |             |             |
|                                                                                 | IRR         | 95% CI      |             |
| English                                                                         | ref         | ref         | ref         |
| Spanish                                                                         | <b>0.90</b> | <b>0.82</b> | <b>0.99</b> |
| Chinese                                                                         | <b>0.85</b> | <b>0.74</b> | <b>0.97</b> |
| Russian                                                                         | 1.04        | 0.92        | 1.18        |
| Cape Verdean                                                                    | 0.86        | 0.74        | 1.01        |
| Other                                                                           | <b>0.86</b> | <b>0.79</b> | <b>0.94</b> |
| <b>Automated Patient Safety Events*</b>                                         |             |             |             |
| English                                                                         | ref         | ref         | ref         |
| Spanish                                                                         | 1.10        | 0.96        | 1.25        |
| Chinese                                                                         | <b>0.81</b> | <b>0.65</b> | <b>1.00</b> |
| Russian                                                                         | 0.93        | 0.76        | 1.14        |
| Cape Verdean                                                                    | 1.01        | 0.76        | 1.34        |
| Other                                                                           | 0.91        | 0.80        | 1.05        |

Note: bolded numbers represent values that are statistically significant at  $p < .05$   
Abbreviations: LEP= limited English proficient; IRR= incident rate ratio. CI= confidence interval.  
\*Adjusting for age, sex, marital status, clinical classification score diagnosis, mortality index, service at discharge, intensive care stay, length of stay, and year of admission. Generalized estimation equations included to account for clustering for multiple admissions per patient.
